# Supplementary material
Source: PubMed Central journal article supplement (PMC11027674)
Supplement: 262_2020_2496_MOESM1_ESM.pdf [file 262_2020_2496_MOESM1_ESM.pdf]

**Table S1: Clinical baseline characteristics of patients included in the study**

|                      | Characteristic            | Standard treatment<br>n=13 | TAA-DC<br>n=5 |
|----------------------|---------------------------|----------------------------|---------------|
| Lung cancer          | Median age, years (range) | 55.8(44-62)                | 53.4(45-68)   |
|                      | Sex, n(%)                 |                            |               |
|                      | Men                       | 10(76.9)                   | 3(60)         |
|                      | Women                     | 3(23.1)                    | 2(40)         |
|                      | Lung cancer statue, n(%)  |                            |               |
|                      | NSCLC                     | 12(92.3)                   | 5(100)        |
|                      | SCLC                      | 1(7.7)                     | 0             |
|                      | Organ metastasis, n(%)    |                            |               |
|                      | Brain                     | 13(100)                    | 5(100)        |
|                      | Bone                      | 4(30.8)                    | 2(40)         |
|                      | Lymph node                | 3(23.1)                    | 1(20)         |
| Others               | 2(15.4)                   | 3(60)                      |               |
| PD-1 treatment, n(%) | 0                         | 4(80)                      |               |
|                      | Characteristic            | Standard treatment<br>n=28 | TAA-DC<br>n=5 |
| GBM                  | Median age, years (range) | 48.9(22-67)                | 36.6(18-55)   |
|                      | Sex, n(%)                 |                            |               |
|                      | Men                       | 21(75)                     | 4(80)         |
|                      | Women                     | 7(25)                      | 1(20)         |
|                      | WHO, n(%)                 |                            |               |
|                      | III                       | 1(4)                       | 0(0)          |
|                      | IV                        | 27(96)                     | 5(100)        |
| Treatment, n(%)      |                           |                            |               |
| Systemic therapy     | 28(100)                   | 5(100)                     |               |

**Table S2: Primer sequences for tested genes**

| NO. | Ag          | Forward Primer          | Reverse Primer            |
|-----|-------------|-------------------------|---------------------------|
| 1   | AIM2        | GCCTCACGTGTGTTAGATGC    | ATCTTCGGGGTTTCACCAGC      |
| 2   | AKAP4       | ATTCCATCAGCAAGGGGCTC    | CTCCTTGGTGTGCCTTAGCA      |
| 3   | Art4        | GGAGGTGGTCACTGAGATTC    | GCACGTATTCCGGTAAGG        |
| 4   | BAGE        | TGGCTCGTCTCACTCTGG      | TCCTGTTGAGCTGCCGTCT       |
| 5   | BCAN        | GGAGGAGGCGACAACTTC      | GAGCTGTCTCCTTCCAGAACA     |
| 6   | BSG         | CCCTTCCTGGGCATCGT       | CGGCGTCGTCATCATCC         |
| 7   | CAIX        | GGACATATCTGCACTCCTGC    | TGCTTAGCACTCAGCATCAC      |
| 8   | CCND1       | CCTCGGTGTCCTACTTCAAAT   | CTCTTTTTACGGGCTCCAG       |
| 9   | CD133       | AGTGGCATCGTGCAAACCTG    | CTCCGAATCCATTTCGACGATAGTA |
| 10  | CDC45L      | GCAGGTGAAGCAGAAGTTCC    | GCATGTCCTTCATCCCAAAT      |
| 11  | CDCA1       | GAGAACTGAAGTCCCAGGAAAT  | CTGATACTTCCATTTCGCTTCAAC  |
| 12  | CEA         | TGTCGGCATCATGATTGG      | GCAAATGCTTTAAGGAAGAAGC    |
| 13  | CSPG4       | CCTTTTGGGAGGCCCATGAT    | GCAGCCTCAAAGACACAGC       |
| 14  | EPCAM       | ACTACAAGCTGGCCGTAAAC    | AGCCCATCATTGTTCTGGAG      |
| 15  | EphA2       | TCCCTGCTGTGCCATGCT      | CCCTCAGCGGAAGTTGCA        |
| 16  | EZH2        | GGCCAGACTGGGAAGAAATC    | ACCTCTTGAGCTGTCTCAGT      |
| 17  | FABP7       | AGCCTGGATGGAGACAACT     | TGCCTTCTCATAGTGGCGAA      |
| 18  | Fos1        | CTGCCGCCCTGTACCTT       | TGCTGCTACTCTTGCGATGA      |
| 19  | GAGE        | TATGCGGCCCGAGCAGTT      | CCTGCCCATCAGGACCATC       |
| 20  | gBK         | GACATCACAGATCCCAAAG     | GTGTTGACGGCTGCTCATC       |
| 21  | glast       | CATCATTGCAGTGGACTGGTTTC | CCCATTTCAACATCTCGGTTCTTC  |
| 22  | gp100       | ACAGGCCAACTGCAGAGG      | CAGTTGGCGCCTGACCAG        |
| 23  | GNTV        | TCAAAGGCAGAACCCAGTCC    | GTGCTGGAGCCATAAACAGT      |
| 24  | HER2        | ATACCCTCTCAGCGTACCCTTGT | TCCGGAGAGACCTGCAAAGA      |
| 25  | HBEGF       | TTCTGGCTGCAGTTCTCTCG    | AAGTCACGGACTTTCCGGTC      |
| 26  | HNRPL       | TGGAGCAGAGGCAGCAG       | TTTTGTGCGGGTCATCGTAG      |
| 27  | HO1         | AGTCTTCGCCCTGTCTACT     | CTTCACATAGCGCTGCATGG      |
| 28  | hTRET       | CGTACAGGTTTCACGCATGTG   | ATGACGCGCAGGAAAAATG       |
| 29  | IGF2BP3     | AGTTGTTGTCCCTCGTGACC    | AGCCTTCTGTTGTTGGTGCT      |
| 30  | IL13Ra2     | GCAATGCACAAATGGATCAGAAG | TGCCAGGTTTCCAAGAACAGAGTA  |
| 31  | IQGAP1      | TGCTGAAGGACTCGTTGCAT    | AGATTTTCGGCGTTGGTCTGT     |
| 32  | ITGAV       | CGCTTCTTCTCTCGGGACTC    | TCACATTTGAGGACCTGCCC      |
| 33  | KIF1C       | ACCGCACCAAGCAAATC       | CTCCCTTCTTCCGTCTTCA       |
| 34  | KIF21B      | GTGAACCAGGACAAGACCAG    | TGTAGCATGGCATTCTCTCG      |
| 35  | KIFC3       | CTGCGTAAGAAGTGCCACAA    | AGGTGGATGATGGAGTCGTC      |
| 36  | LAGE1/CTAG2 | GTGTCCGGCAACCTACTGTT    | CACATCAACAGGGAAAGCTG      |
| 37  | Lck         | AGTCAGATGTGTGGTCTTTTGG  | CCTCCGGGTTGGTCATC         |
| 38  | LRR8A       | AGGGAAAGGTGGGCTGCCTTT   | ATACTGAAGAGGCAAGCTCCAG    |
| 39  | MAGE1       | ACTGCAAGCCTGAGGAAGCC    | TGGGTTGCCTCTGTGAGTG       |
| 40  | MAGE10      | TACTGCACCCCTGAGGAGGTC   | TGTGGTGGCAATTCTGTCCTG     |

|    |          |                             |                           |
|----|----------|-----------------------------|---------------------------|
| 41 | MAGE2    | ATGCCTCTTGAGCAGAGGAG        | GAGCCCTCATCGGATTGTC       |
| 42 | MAGE3    | GTCGTCCGAAATTGGCAGTAT       | GCAGGTGGCAAAGATGTACAA     |
| 43 | MAGE4    | CCACTACCATCAGCTTCACTTGC     | CTTCTCGGAACAAGGACTCTGC    |
| 44 | MAGE6    | GTCGTCCGAAATTGGCAGT         | GCAGGTGGCAAAGATGTACAC     |
| 45 | Mart1    | GCTCATCGGCTGTTGGTATT        | CTGTCCCGATGATCAAACCC      |
| 46 | MELK     | GCCTGCCATATCCTTACTGG        | AATCTCCGTTTTGATCCGGG      |
| 47 | MET      | CCATCCAGTGTCTCCAGAAGTG      | TTCCAGTGATAACCAGTGTGTAG   |
| 48 | MUC1     | AATGAATGGCTCAAACTTGG        | CACTAGGTTCTCACTCGCTCAG    |
| 49 | NLGN4X   | AGAATGCCTGCGGAACAAGA        | TCCACGAACTTCAGGCCTTC      |
| 50 | NrCAM    | TTGTGCAAAGAGGGAGCATG        | GGGCAGTTCCTGTTGTCT        |
| 51 | NY-BR-1  | ATCCTAGACTGGCTTCTGCT        | ACAAGCATCTCCTGCAATGT      |
| 52 | NY-ESO-1 | TGTCCGGCAACATACTGACT        | ACTGCGTGATCCACATCAAC      |
| 53 | OFA/iLRP | CTGGTCTGAAGGTGTACAGGTGC     | CTTAAGAGCCTATGCAAGAACAG   |
| 54 | PCNA     | TCTGAGGGCTTCGACACCTA        | CATTGCCGGCGCATTTTAGT      |
| 55 | PIK3R1   | AACGAGTGGTTGGGCAATGA        | CCTCGCAACAGGTTTTTCAGC     |
| 56 | PRAME    | TCCAGAGCCAGAAGCAG           | GGAACAGGTCTACGAGCA        |
| 57 | PRKDC    | ACCTGTTCTGGCAGGATGTC        | TCTGAGGACGAATTGCCTTT      |
| 58 | PTHLH    | CCATCCAAGATTTACGGCGA        | GGTGGTTCTTTGTGTTGGGA      |
| 59 | PTPRZ1   | ACCCCATCCTCCAGACAACA        | GTAGCATGCAAGGCCGAATC      |
| 60 | RPL19    | CTCAGGCTTCAGAAGAGGCT        | ATTGGCGATTTTATTGGTCT      |
| 61 | Sart1    | AAGCAGCAGCAGGATTTTC         | TCCAGCAGCCCTTTGTTTC       |
| 62 | Sart2    | CCCTCTATGAAGGAGTTGCG        | GGCCAAAGTGGTTGATGTTG      |
| 63 | Sart3    | GAAATGTGCTGCCGTAGA          | TGCTGACAAAGACGGTGA        |
| 64 | SEC61G   | GGACTCCATTTCGGCTGGTTA       | AGCAAATCCTATTGCTGTTGCC    |
| 65 | SGT1     | CTGACTAAGGCTTTGGAACAGAA     | CTGTAAAAGTTTCTAGGGCAGCA   |
| 66 | Sox10    | ATGCCAAAGCCCAGGTGA          | TGAGGGAGGTGTAGGCGATC      |
| 67 | Sox11    | ACGGTCAAGTGCCTGTTTCTG       | TGCTGGTGCAGGTGGTTCCCTC    |
| 68 | Sox2     | AAATGGGAGGGGTGCAAAGAGGAG    | CAGCTGTCATTTGCTGTGGGTGATG |
| 69 | Sox4     | CGTCCTCAGATGACTTTCCGG       | TCTGGCACTTCCTTCAAACC      |
| 70 | SP17     | GCTCGGAGAGAAAGGAGGTTTC      | TACTCCCCATTCTGCTGGA       |
| 71 | SPAG9    | AGTCATCAGCCCACAAAGTAGCAG    | GATTCTCCACCTTCATCACCCATT  |
| 72 | SPANXB   | TAGTGGTTCGCTACAGGAGGAACGTGA | TTGCCGAAGTTTGAGGGATGTAG   |
| 73 | STAT3    | CCAAGCGAGGACTGAGCATC        | CCAGACCCAGAAGGAGAAGC      |
| 74 | Survivin | ACTGAGAACGAGCCAGACTT        | CGGACGAATGCTTTTTATGTTT    |
| 75 | TARA     | GCCATGACGCCGATCTG           | AGGTGGT-GGTGAGCGAGG       |
| 76 | TFT      | CGCTTCAAGGAGCTCACCA         | CGAAGTCCAGCAGGAAGGAG      |
| 77 | TNC      | TGGCATCGGAGAATGCCTTT        | CAGCTTCCTCTGGGTTCCCTG     |
| 78 | TPBG     | GCGGACCCAGATTAACAAAC        | GTGTGGGTACACTTGCTACACC    |
| 79 | Trag3    | AGTAGACTGTTGAGAGACGCT       | TCCACTTCCTCGCCTCTTTG      |
| 80 | TRP1     | TGCCCCCTTTGATGATGATG        | CTGATACCACCCACTGTTTCG     |
| 81 | TRP2     | CCTGTCTCTCCAGAAGTTTG        | CAGAGTCCCATCTGCTTTATC     |
| 82 | Ube2V    | TCTAATGGAGTGGTGGACCC        | CTGTAACACTGTCCTTCGGG      |
| 83 | Whsc-2   | AACGCCCTGACGACCCT           | CGCTCCGCTTCAACTGC         |

|    |         |                       |                       |
|----|---------|-----------------------|-----------------------|
| 84 | WT1     | GATAACCACACAACGCCCATC | CACACGTCGCACATCCTGAAT |
| 85 | XAGE-1b | TGGATTCTTTCTCCGCTACTG | AAACCAGCTTGC GTTGTTC  |
| 86 | YKL39   | TTGACTGTGGCGTATC      | AGAGGGCTGTTGTGGC      |
| 87 | YKL40   | AACGATCACATCGACACCTG  | TTGAGACCCAAAGTTCCATC  |

### Tumor Microenvironment Immunosuppressive Genes

| NO. | Ag    | Forward Primer          | Reverse Primer             |
|-----|-------|-------------------------|----------------------------|
| 1   | COX1  | GGAGTTTGTCAATGCCACCT    | GCAACTGCTTCTTCCCTTTG       |
| 2   | COX2  | GGTCTGGTGCCTGGTCTGAT    | TCCTGTTTAAGCACATCGCATACT   |
| 3   | FOXP3 | TGACCAAGGCTTCATCTGTG    | AGGAACTCTGGGAATGTGCT       |
| 4   | IDO1  | GCCCTTCAAGTGTTCACCAA    | GCCTTTCCAGCCAGACAAATAT     |
| 5   | PDL1  | GTGCATGATCAGCTATGGTGGTG | CAGTTCATGTTCCAGAGGTGACTGGA |
| 6   | PDL2  | CTGGAATTGCAGCTTCACCAGA  | GTTGCATTCCAGGGTCACATTG     |
| 7   | PGE2  | GTACTGGCTTCGTACGCGCG    | TAGCGCTCCAGGGCCATGGC       |
| 8   | TDO   | GGGAACTACCTGCATTTGGA    | GTGCATCCGAGAAACAACCT       |

**Table S3: Phenotypic analysis of infused DCs**

| Patient | Average number of DCs per infusion ( $10^7$ ) | Viability (%) | CD80 (%)  | CD83 (%)  | CD86 (%)  | CD11c (%) | CD14- (%) | HLA-ABC (%) | HLA-DR(%) | CCR7 (%)  |
|---------|-----------------------------------------------|---------------|-----------|-----------|-----------|-----------|-----------|-------------|-----------|-----------|
| BT001   | 1.8±0.8                                       | 78.6±13.0     | 52.2±32.3 | 88.7±5.4  | 96.3±1.9  | 93.5±2.9  | 97.3±1.8  | 92.2±3.2    | 95.8±2.2  | 26.3±14.1 |
| BT045   | 1.8±0.9                                       | 82.6±7.2      | 78.3±20.2 | 86.8±8.6  | 93.4±7.2  | 96.4±3.3  | 94.8±3.2  | 92.2±8.6    | 97.9±1.9  | 36.5±14.3 |
| BT051   | 2.4±1.2                                       | 85.9±5.3      | 84.1±21.4 | 88.2±17.2 | 98.0±1.3  | 84.3±30   | 95.1±5.3  | 92.8±9.3    | 95.3±10.1 | 36.2±12.5 |
| BT077   | 2.0±0.7                                       | 89.2±2.3      | 84.5±9.1  | 89.9±4.2  | 98.9±3.5  | 98.8±1.5  | 92.8±5.0  | 96.7±4.5    | 98.9±3.5  | 46.5±20.4 |
| BT079   | 1.4±0.7                                       | 91.4±3.8      | 87.7±7.3  | 73.3±16.8 | 96.6±2.6  | 89.0±18.0 | 74.0±23.1 | 92.6±6.6    | 96.2±3.4  | 32.9±20.8 |
| BT030   | 1.6±0.8                                       | 85.5±7.2      | 75.8±0.6  | 78.6±14.5 | 95.3±5.8  | 94.5±4.3  | 90.5±10.5 | 95.8±4.3    | 98.0±2.3  | 46.6±26.4 |
| BT044   | 1.6±0.5                                       | 84.9±7.2      | 74.0±17.3 | 78.8±14.0 | 91.5±13.6 | 92.0±10.9 | 96.0±2.6  | 96.3±2.1    | 98.2±1.7  | 31.5±11.0 |
| BT063   | 1.1±0.4                                       | 90.5±3.6      | 88.7±8.1  | 84.0±9.3  | 94.9±3.8  | 94.9±2.9  | 80.2±11.7 | 97.5±2.0    | 98.1±1.6  | 39.9±11.2 |
| BT056   | 2.0±1.2                                       | 85.1±2.6      | 53.5±27.1 | 85.8±8.0  | 95.8±3.7  | 90.1±10.1 | 97.5±6.7  | 95.0±1.7    | 98.2±1.1  | 17.1±12.8 |
| BT057   | 1.4±1.5                                       | 84.4±6.0      | 78.8±24.9 | 93.1±6.8  | 97.8±0.7  | 98.2±0.8  | 83.8±16.3 | 97.3±1.1    | 98.9±0.7  | 46.6±21.5 |

Viability and phenotypes: Mean ± SEM, % positive

**Table S4. Percent of immunized TAAs that induced specific T cell responses and clinical outcomes**

| Patients |         | 1                | 2               | 3                 | 4                |
|----------|---------|------------------|-----------------|-------------------|------------------|
| BT001    | Period  | 5/24/16-7/2/16   | 7/27/16-9/2/16  |                   |                  |
|          | Percent | 100%             | 40%             |                   |                  |
|          | Outcome | PR               | PR              |                   |                  |
| BT051    | Period  | 11/2/16-12/10/16 | 1/3/17-2/10/17  | 4/7/17-5/30/17    | 10/3/17-10/31-17 |
|          | Percent | 100%             | 100%            | 100%              | 100%             |
|          | Outcome | PR               | PR              | Lung PR, Brain PD | PD               |
| BT077    | Period  | 7/7/17-8/18-17   | 9/5/17-10/27/17 |                   |                  |
|          | Percent | 100%             | 100%            |                   |                  |
|          | Outcome | PR               | PR              |                   |                  |
| BT079    | Period  | 7/11/17-8/29/17  | 9/19/17-11/7-17 |                   |                  |
|          | Percent | 50%              | 100%            |                   |                  |
|          | Outcome | SD               | PR              |                   |                  |
| BT030    | Period  | 1/14/17-3/18-17  |                 |                   |                  |
|          | Percent | 100%             |                 |                   |                  |
|          | Outcome | PD               |                 |                   |                  |
| BT063    | Period  | 4/14/17-6/16/17  |                 |                   |                  |
|          | Percent | 33%              |                 |                   |                  |
|          | Outcome | SD               |                 |                   |                  |
| BT057    | Period  | 1/17/17-3/10/17  |                 |                   |                  |
|          | Percent | 100%             |                 |                   |                  |
|          | Outcome | PD               |                 |                   |                  |

Percent of TAAs that induced specific T cell response: Percent is expressed as the number of immunized TAAs that induced a ABLR (Above Base Line Response (as calculated in Table 3)) divided by the total number of TAAs immunized to the individual patients. PR: Partial response. PD: Progressive disease. SD: Stable disease

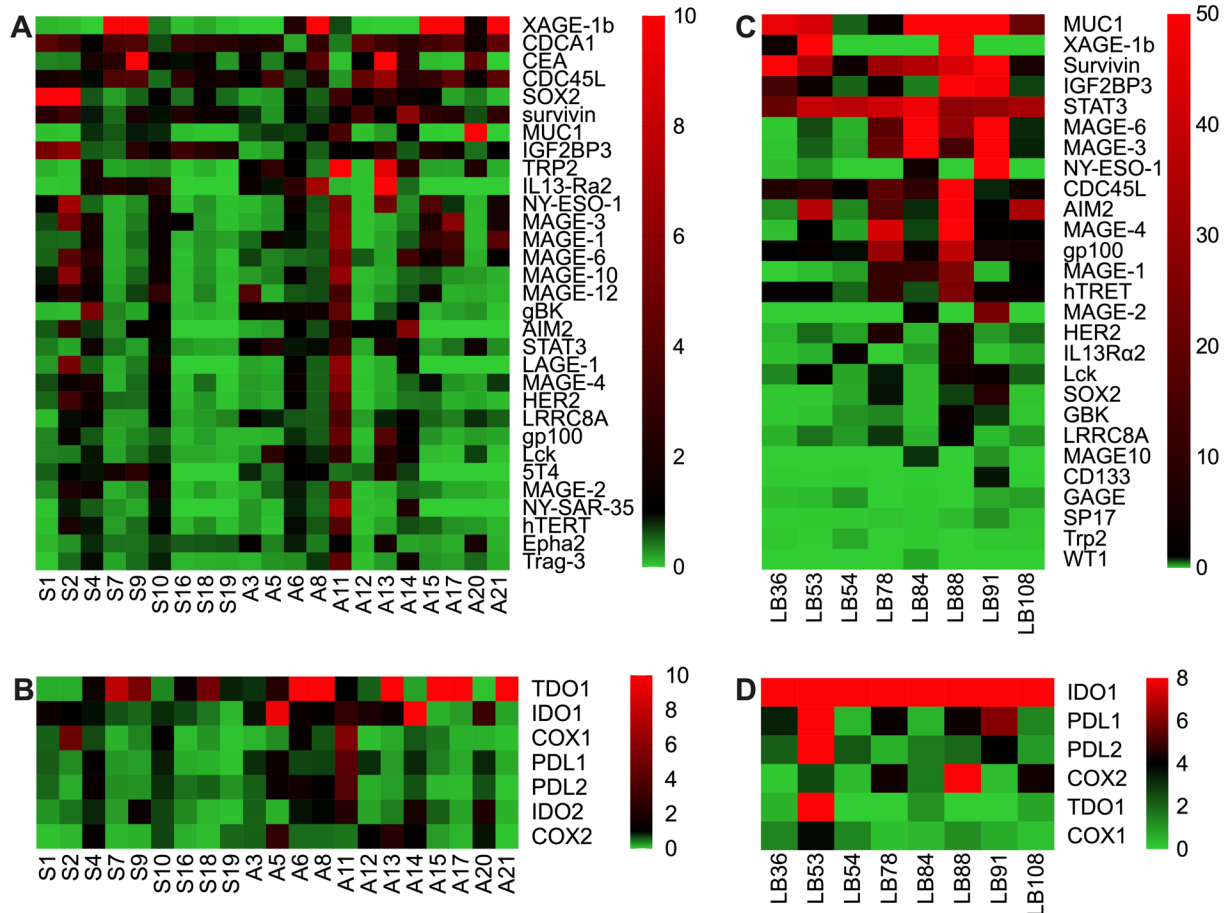

**Figure S1. Heatmap of mRNA expression of TAAs and TME immunosuppressive factors in NSCLC tumor samples from lung lesion and brain metastasis.** The mRNAs of the indicated TAA and TME immunosuppressive factors in tumor samples from lung and brain were assayed by qPCR in triplicates. The mRNA expression levels of the measured genes were expressed as mean fold changes calculated by  $2^{-\Delta\Delta CT}$  ( $\Delta\Delta CT = [(Ct \text{ TAA} - Ct \text{ GAPDH})_{\text{Sample}}] - [(Ct \text{ TAA} - Ct \text{ GAPDH})_{\text{Control}}]$ ). **(A)** Expression of TAAs in 21 tumor samples from lung. S1-S19, squamous cell NSCLC; A3-A21, adenocarcinoma NSCLC. **(B)** Expression of TME immunosuppressive factors in 21 tumor samples from lung as in (A). **(C)** Expression of TAAs in 8 tumor samples from NSCLC brain metastasis. **(D)** Expression of TME immunosuppressive factors in 8 tumor samples from NSCLC brain metastasis. Color bar and number represent fold changes. (A, B), lung para-tumor tissues were used as controls for comparison. (C, D), pooled samples (n=6) of normal brain tissues were used as controls for comparison.
